# Supplementary material
Source: publisher site journal article supplement (https://www.dovepress.com/article/443607)
Supplement: Supplementary file 1 [file get_supplementary_file.php]

Appendix 1: Search Strategy

| **#** | **Query** | **Result** |
| --- | --- | --- |
| **cancer screening** | | |
| **1** | "Stomach Neoplasms"[Mesh] | 106471 |
| **2** | "Gastric Neoplasm"[Title/Abstract] OR "Cancer of Stomach"[Title/Abstract] OR "Stomach Cancers"[Title/Abstract] OR "Gastric Cancer"[Title/Abstract] OR "Gastric Cancers"[Title/Abstract] OR "Stomach Cancer"[Title/Abstract] OR "Cancer of the Stomach"[Title/Abstract] OR "Familial Diffuse Gastric Cancer"[Title/Abstract] | 88553 |
| **3** | "Colorectal Neoplasms"[Mesh] | 227171 |
| **4** | "Colorectal Neoplasm"[Title/Abstract] OR "Colorectal Tumors"[Title/Abstract] OR "Colorectal Tumor"[Title/Abstract] OR "Colorectal Cancer"[Title/Abstract] OR "Colorectal Cancers"[Title/Abstract] OR "Colorectal Carcinoma"[Title/Abstract] OR "Colorectal Carcinomas"[Title/Abstract] | 138404 |
| **5** | #1 OR #2 OR #3 OR #4 | 536944 |
| **6** | "Mass Screening"[Mesh] | 141012 |
| **7** | Mass Screenings[Title/Abstract] OR Mass Screening[Title/Abstract] OR Screening[Title/Abstract] OR Screenings[Title/Abstract] | 630401 |
| **8** | "Early Detection of Cancer"[Mesh] | 34356 |
| **9** | Cancer Early Detection[Title/Abstract] OR Cancer Screening[Title/Abstract] OR Early Diagnosis of Cancer[Title/Abstract] OR Cancer Early Diagnosis[Title/Abstract] | 39750 |
| **10** | #6 OR #7 OR #8 OR #9 | 687335 |
| **11** | #5 AND #10 | 51334 |
| **Awareness, attitude, behaviour and adherence** | | |
| **12** | "Awareness"[Mesh] | 21565 |
| **13** | "Knowledge"[Mesh] | 13433 |
| **14** | Epistemology[Title/Abstract]) | 2208 |
| **15** | "Perception"[Mesh] | 469823 |
| **16** | "Attitude"[Mesh] | 625247 |
| **17** | "Attitude to Health"[Mesh] | 462324 |
| **18** | #12 OR #13 OR #14 OR #15 OR #16 OR #17 | 1113144 |
| **19** | "Behavior"[Mesh] | 2018165 |
| **20** | Behaviors[Title/Abstract] | 242440 |
| **21** | "Health Behavior"[Mesh] | 353149 |
| **22** | (Health Behaviors[Title/Abstract] OR Health-Related Behavior[Title/Abstract] OR Health-Related Behaviors[Title/Abstract] OR Health Related Behavior[Title/Abstract]) | 15623 |
| **23** | #19 OR #20 OR #21 OR #22 | 2154656 |
| **24** | "Treatment Adherence and Compliance"[Mesh] | 270058 |
| **25** | Compliance[Title/Abstract] OR adherence[Title/Abstract] | 869 |
| **26** | #24 OR #25 | 270447 |
| **27** | #18 OR #23 OR #26 | 2777228 |
| **Influencing factors** | | |
| **28** | ((((hinder[Title/Abstract]) OR (barrier[Title/Abstract])) OR (impede[Title/Abstract])) OR (((((promote[Title/Abstract]) OR (motivate[Title/Abstract])) OR (expedite[Title/Abstract])) OR (accelerate[Title/Abstract])) OR (facilitate[Title/Abstract]))) OR ((((influence[Title/Abstract]) OR (affect[Title/Abstract])) OR (effect[Title/Abstract])) OR (impact[Title/Abstract])) | 6663833 |
| **Intervention** | | |
| **29** | Clinical Trial [Publication Type] | 946160 |
| **30** | intervention[Title/Abstract] OR experiment[Title/Abstract] OR experimental[Title/Abstract] OR trial [Title/Abstract] | 2861675 |
| **31** | #29 OR #30 | 3405032 |
| **32** | #11 AND #27 AND #28 AND #31 Filter:English | 828 |
